# Supplementary material for: Genome-wide association study reveals ethnicity-specific SNPs associated with ankylosing spondylitis in the Taiwanese population
Source: Springer Nature journal article supplement (doi:10.1186/s12967-022-03701-3), 2022-12-12
Supplement: MOESM2 [file 23816264]

**Supplementary Tables. The correlations of tag SNPs with mapped gene expression**  
**Table S1. The 147 SNPs associated with AS.**

Additional file 1

**Table S2. The correlation of SNPs with gene expression in certain tissues.**

| <i>SNP</i> | <i>A1/A2*</i>             | <i>Gene Symbol</i> | <i>Tissue</i>             | <i>NES*</i> | <i>P value</i>  |
|------------|---------------------------|--------------------|---------------------------|-------------|-----------------|
| rs7766452  | A/G                       | HLA-C              | muscle–skeletal           | 0.61        | 4.90E-09        |
|            |                           | HLA-C              | whole blood               | 0.26        | 2.70E-04        |
|            |                           | HLA-C              | cell-cultured fibroblasts | 1           | 7.70E-14        |
| rs9368671  | T/C                       | CCHCR1             | cell-cultured fibroblasts | -0.18       | 1.20E-06        |
| rs2073716  | G/C                       | CCHCR1             | muscle–skeletal           | -0.37       | 9.40E-06        |
|            |                           | CCHCR1             | whole blood               | -0.3        | 7.60E-07        |
|            |                           | CCHCR1             | cell-cultured fibroblasts | -0.17       | 6.00E-05        |
| rs6936035  | G/A                       | HLA-B              | cell-cultured fibroblasts | -0.2        | 3.90E-04        |
|            |                           | MICA               | cell-cultured fibroblasts | -0.78       | 3.20E-35        |
|            |                           | XXbac-BPG181B23.7  | muscle–skeletal           | -0.79       | 2.10E-53        |
|            |                           | XXbac-BPG181B23.7  | whole blood               | -0.72       | 2.70E-73        |
|            |                           | XXbac-BPG181B23.7  | cell-cultured fibroblasts | -0.87       | 1.70E-42        |
| rs9688839  | G/A                       | HCG27              | whole blood               | 0.15        | 2.30E-05        |
|            |                           | HCG27              | cell-cultured fibroblasts | 0.31        | 6.10E-06        |
|            |                           | MIR6891            | whole blood               | 0.54        | 1.50E-10        |
|            |                           | NCR3               | whole blood               | -0.14       | 8.40E-06        |
|            |                           | PSORS1C3           | muscle–skeletal           | 0.39        | 1.50E-04        |
|            |                           | PSORS1C3           | whole blood               | 0.33        | 2.00E-06        |
|            |                           | rs2251396          | A/G                       | MICA        | muscle–skeletal |
| MICA       | whole blood               |                    |                           | 0.25        | 6.40E-13        |
| MICA       | cell-cultured fibroblasts |                    |                           | 0.63        | 1.70E-25        |
| C4A        | muscle–skeletal           |                    |                           | -0.29       | 1.60E-09        |
| C4A        | whole blood               |                    |                           | -0.48       | 1.50E-16        |
| C4A        | cell-cultured fibroblasts |                    |                           | -0.28       | 3.50E-11        |
| C4B        | whole blood               |                    |                           | 0.47        | 2.60E-13        |

|             |     |                    |                           |       |          |
|-------------|-----|--------------------|---------------------------|-------|----------|
|             |     | C4B                | cell-cultured fibroblasts | 0.3   | 2.20E-13 |
|             |     | CCHCR1             | whole blood               | 0.13  | 8.10E-05 |
|             |     | CYP21A1P           | muscle–skeletal           | -0.31 | 8.00E-08 |
|             |     | CYP21A1P           | whole blood               | -0.4  | 1.10E-12 |
|             |     | CYP21A1P           | cell-cultured fibroblasts | -0.23 | 4.30E-05 |
|             |     | CYP21A2            | whole blood               | 0.4   | 3.20E-10 |
|             |     | CYP21A2            | cell-cultured fibroblasts | 0.28  | 1.50E-05 |
| rs3094228   | A/G | DDAH2              | muscle–skeletal           | -0.1  | 5.90E-06 |
|             |     | FLOT1              | whole blood               | 0.06  | 2.20E-05 |
|             |     | HCG20              | cell-cultured fibroblasts | -0.32 | 3.20E-05 |
|             |     | HLA-C              | muscle–skeletal           | 0.42  | 2.40E-16 |
|             |     | HLA-C              | cell-cultured fibroblasts | 0.46  | 1.50E-10 |
|             |     | HLA-S              | whole blood               | -0.27 | 3.70E-05 |
|             |     | LINC00243          | cell-cultured fibroblasts | 0.29  | 1.50E-04 |
|             |     | LY6G5B             | cell-cultured fibroblasts | 0.14  | 3.60E-04 |
|             |     | MICB               | muscle–skeletal           | 0.34  | 1.90E-10 |
|             |     | MICB               | cell-cultured fibroblasts | 0.37  | 1.30E-12 |
|             |     | NOTCH4             | muscle–skeletal           | -0.2  | 1.50E-07 |
|             |     | PPP1R18            | cell-cultured fibroblasts | -0.11 | 1.90E-05 |
|             |     | RNF5               | muscle–skeletal           | -0.12 | 1.80E-07 |
|             |     | XXbac-BPG248L24.12 | whole blood               | -0.24 | 1.50E-04 |
| rs142577772 | T/C | -                  | -                         | -     | -        |
| rs28862571  | T/C | -                  | -                         | -     | -        |

\* A1 is the minor allele, and A2 is the major allele.

\*\* Normalized effect size (NES) = Alternative allele/reference allele. Positive values indicate that the alternative allele is correlated with increased expression level, and vice versa.

### Table S3. Information on selected SNPs in the six different PRS models.

Additional file 2

**Table S4. Odds ratio for developing AS according to PRS deciles.**

Additional file 3

**Table S5. The prevalence of tag SNPs in Asian populations.**

| Block | SNP         | MAF   |       |       |       |       |       |       |
|-------|-------------|-------|-------|-------|-------|-------|-------|-------|
|       |             | TW    | CHS   | CDX   | CHB   | JPT   | KHV   | EAS   |
| 1     | rs142577772 | 0.085 | 0.033 | 0.07  | 0.01  | 0.01  | 0.015 | 0.027 |
| 2     | rs7756294   | 0.131 | 0.067 | 0.113 | 0.049 | 0.019 | 0.136 | 0.075 |
| 3     | rs2073716   | 0.206 | 0.186 | 0.204 | 0.146 | 0.197 | 0.182 | 0.183 |
| 4     | rs76977405  | 0.11  | 0.043 | 0.091 | 0.053 | 0.154 | 0.071 | 0.082 |
| 5     | rs7766452   | 0.088 | 0.014 | 0.054 | 0.005 | 0.005 | 0.045 | 0.024 |
| 6     | rs9368671   | 0.3   | 0.219 | 0.382 | 0.17  | 0.144 | 0.207 | 0.221 |
| 7     | rs28862571  | 0.151 | 0.086 | 0.118 | 0.136 | 0.236 | 0.091 | 0.134 |
| 8     | rs9266267   | 0.123 | 0.057 | 0.07  | 0.087 | 0.159 | 0.061 | 0.087 |
| 9     | rs6936035   | 0.286 | 0.195 | 0.22  | 0.238 | 0.207 | 0.232 | 0.218 |
| 10    | rs2251396   | 0.314 | 0.286 | 0.478 | 0.262 | 0.135 | 0.348 | 0.298 |
| 11    | rs3094228   | 0.229 | 0.138 | 0.242 | 0.126 | 0.024 | 0.369 | 0.177 |
| 12    | rs9688839   | 0.169 | 0.086 | 0.129 | 0.121 | 0.154 | 0.116 | 0.121 |

TW: Taiwan

CHS: Southern Han Chinese, China

CDX: Chinese Dei in Xishuangbanna, China

CHB: Han Chinese in Beijing, China

JPT : Japanese in Tokyo, Japan

KHV: Kinh in Ho Chi Minh City, Vietnam

EAS: East Asian
